# Supplementary material for: Bulk RNA-seq datasets analysis integration identifies robust drought-responsive genes and functional networks in Eucalyptus grandis
Source: Research Square preprint supplement (doi:10.21203/rs.3.rs-7960812/v1), 2026-01-13
Supplement: Supplementary file 1 [file 8785b4df954617106cd349c7.pdf]

## Bulk RNA-seq datasets analysis integration identifies robust drought-responsive genes and functional networks in *Eucalyptus grandis*

João Vitor Aires Teixeira, Gabriel Quintanilha-Peixoto, Nivea Maria Pereira Lima, Renato Almeida Sarmiento, Kellen Kauanne Pimenta de Oliveira

Correspondence should be addressed to kauanne@mail.uft.edu.br (Kellen Kauanne Pimenta de Oliveira)

### Supplementary Table 2: Protein symbols corresponding to nodes in the PPI network.

| Symbol | Protein name (StringDB)                                                                                                                                                                         | meta.logFC.weighted | Direction |
|--------|-------------------------------------------------------------------------------------------------------------------------------------------------------------------------------------------------|---------------------|-----------|
| UNK    | Uncharacterized protein.                                                                                                                                                                        | -4,196315001        | DOWN      |
| BETV1  | Bet_v_1 domain-containing protein; Belongs to the BetVI family.                                                                                                                                 | -3,661895249        | DOWN      |
| CYP    | Uncharacterized protein; Belongs to the cytochrome P450 family.                                                                                                                                 | -3,457904357        | DOWN      |
| GH32   | Uncharacterized protein; Belongs to the glycosyl hydrolase 32 family.                                                                                                                           | -3,197343445        | DOWN      |
| UNK    | Uncharacterized protein.                                                                                                                                                                        | -3,193055154        | DOWN      |
| GAT-1  | Glutamine amidotransferase type-1 domain-containing protein.                                                                                                                                    | -3,051993042        | DOWN      |
| Fe2OGD | Fe2OG dioxygenase domain-containing protein; Belongs to the iron/ascorbate-dependent oxidoreductase family.                                                                                     | -3,033262031        | DOWN      |
| PIN    | Auxin-responsive protein; Aux/IAA proteins are short-lived transcriptional factors that function as repressors of early auxin response genes at low auxin concentrations.                       | -2,691848495        | DOWN      |
| PMEI   | PMEI domain-containing protein.                                                                                                                                                                 | -2,286438945        | DOWN      |
| UNK    | Uncharacterized protein.                                                                                                                                                                        | -2,147283547        | DOWN      |
| CXC    | CXC domain-containing protein.                                                                                                                                                                  | -2,129376623        | DOWN      |
| SUS    | Sucrose synthase; Sucrose-cleaving enzyme that provides UDP-glucose and fructose for various metabolic pathways. Belongs to the glycosyltransferase 1 family. Plant sucrose synthase subfamily. | -1,952149439        | DOWN      |
| PMR5N  | PMR5N domain-containing protein.                                                                                                                                                                | -1,892126542        | DOWN      |

|       |                                                                                                                                                                                                                                                                                                                                    |              |      |
|-------|------------------------------------------------------------------------------------------------------------------------------------------------------------------------------------------------------------------------------------------------------------------------------------------------------------------------------------|--------------|------|
| RPA   | Replication protein A subunit; Component of the replication protein A complex (RPA) required for DNA recombination, repair and replication. The activity of RPA is mediated by single-stranded DNA binding and protein interactions. Probably involved in repair of double-strand DNA breaks (DSBs) induced by genotoxic stresses. | -1,840680812 | DOWN |
| WDRR  | WD_REPEATS_REGION domain-containing protein.                                                                                                                                                                                                                                                                                       | -1,813529406 | DOWN |
| SLD5  | Sld5 domain-containing protein.                                                                                                                                                                                                                                                                                                    | -1,765503196 | DOWN |
| GH5   | Uncharacterized protein; Belongs to the glycosyl hydrolase 5 (cellulase A) family.                                                                                                                                                                                                                                                 | -1,69720344  | DOWN |
| MCM   | DNA helicase; Belongs to the MCM family.                                                                                                                                                                                                                                                                                           | -1,638615352 | DOWN |
| UNK   | Uncharacterized protein.                                                                                                                                                                                                                                                                                                           | -1,571338538 | DOWN |
| MCM   | DNA helicase; Belongs to the MCM family.                                                                                                                                                                                                                                                                                           | -1,568559646 | DOWN |
| UNK   | Uncharacterized protein.                                                                                                                                                                                                                                                                                                           | -1,562059554 | DOWN |
| UNK   | Uncharacterized protein.                                                                                                                                                                                                                                                                                                           | -1,545806243 | DOWN |
| HL4   | Hydrolase_4 domain-containing protein.                                                                                                                                                                                                                                                                                             | -1,52376379  | DOWN |
| REM   | Remorin_C domain-containing protein.                                                                                                                                                                                                                                                                                               | -1,516406079 | DOWN |
| PK    | Protein kinase domain-containing protein.                                                                                                                                                                                                                                                                                          | -1,48670209  | DOWN |
| ENTH  | ENTH domain-containing protein.                                                                                                                                                                                                                                                                                                    | -1,480007944 | DOWN |
| MCM   | DNA helicase; Belongs to the MCM family.                                                                                                                                                                                                                                                                                           | -1,464431645 | DOWN |
| UNK   | Uncharacterized protein.                                                                                                                                                                                                                                                                                                           | -1,446145602 | DOWN |
| UNK   | Uncharacterized protein.                                                                                                                                                                                                                                                                                                           | -1,415915958 | DOWN |
| BETV1 | Bet_v_1 domain-containing protein.                                                                                                                                                                                                                                                                                                 | -1,256965226 | DOWN |
| F-BOX | F-box domain-containing protein.                                                                                                                                                                                                                                                                                                   | -1,165724519 | DOWN |
| Mtase | Uncharacterized protein; Belongs to the class I-like SAM-binding methyltransferase superfamily. Cation-independent O-methyltransferase family.                                                                                                                                                                                     | -1,055740577 | DOWN |
| UNK   | Uncharacterized protein.                                                                                                                                                                                                                                                                                                           | -1,024801547 | DOWN |
| CBM20 | CBM20 domain-containing protein.                                                                                                                                                                                                                                                                                                   | 1,023392204  | UP   |
| UNK   | Uncharacterized protein.                                                                                                                                                                                                                                                                                                           | 1,105397093  | UP   |
| HSF   | HSF_DOMAIN domain-containing protein.                                                                                                                                                                                                                                                                                              | 1,119083575  | UP   |

|             |                                                                                                                                                                                                                                                                                                |             |    |
|-------------|------------------------------------------------------------------------------------------------------------------------------------------------------------------------------------------------------------------------------------------------------------------------------------------------|-------------|----|
| AMP         | AMP-binding domain-containing protein.                                                                                                                                                                                                                                                         | 1,144367113 | UP |
| HSF         | HSF_DOMAIN domain-containing protein.                                                                                                                                                                                                                                                          | 1,217477208 | UP |
| GST1        | Uncharacterized protein; Belongs to the glycosyltransferase 1 family.                                                                                                                                                                                                                          | 1,249839778 | UP |
| STK         | Non-specific serine/threonine protein kinase; Belongs to the protein kinase superfamily.                                                                                                                                                                                                       | 1,260046312 | UP |
| UNK         | Uncharacterized protein.                                                                                                                                                                                                                                                                       | 1,309603432 | UP |
| PFP-ALPHA-2 | Pyrophosphate--fructose 6-phosphate 1-phosphotransferase subunit alpha; Regulatory subunit of pyrophosphate--fructose 6-phosphate 1- phosphotransferase.                                                                                                                                       | 1,356362304 | UP |
| PYG         | Alpha-1,4 glucan phosphorylase; Phosphorylase is an important allosteric enzyme in carbohydrate metabolism. Enzymes from different sources differ in their regulatory mechanisms and in their natural substrates. However, all known phosphorylases share catalytic and structural properties. | 1,425189132 | UP |
| ClpA/ClpB   | Uncharacterized protein; Belongs to the ClpA/ClpB family.                                                                                                                                                                                                                                      | 1,471027239 | UP |
| UNK         | Uncharacterized protein.                                                                                                                                                                                                                                                                       | 1,528700534 | UP |
| UNK         | Uncharacterized protein.                                                                                                                                                                                                                                                                       | 1,529226452 | UP |
| UNK         | Uncharacterized protein.                                                                                                                                                                                                                                                                       | 1,640072849 | UP |
| UNK         | Uncharacterized protein.                                                                                                                                                                                                                                                                       | 1,646431999 | UP |
| PTP         | Tyrosine-protein phosphatase domain-containing protein.                                                                                                                                                                                                                                        | 1,654065391 | UP |
| UNK         | Uncharacterized protein.                                                                                                                                                                                                                                                                       | 1,672054798 | UP |
| TPP         | Trehalose 6-phosphate phosphatase; Removes the phosphate from trehalose 6-phosphate to produce free trehalose.                                                                                                                                                                                 | 1,725579513 | UP |
| SS          | Starch synthase, chloroplastic/amyloplastic; Belongs to the glycosyltransferase 1 family. Bacterial/plant glycogen synthase subfamily.                                                                                                                                                         | 1,731656599 | UP |
| GH18        | Glyco_hydro_18 domain-containing protein; Belongs to the glycosyl hydrolase 18 family.                                                                                                                                                                                                         | 1,756557098 | UP |
| JD          | J domain-containing protein.                                                                                                                                                                                                                                                                   | 1,773177739 | UP |
| PIMT        | Protein-L-isoaspartate O-methyltransferase.                                                                                                                                                                                                                                                    | 1,805373863 | UP |
| UNK         | Uncharacterized protein.                                                                                                                                                                                                                                                                       | 1,807614483 | UP |
| HSP70       | Uncharacterized protein; Belongs to the heat shock protein 70 family.                                                                                                                                                                                                                          | 1,810384196 | UP |

|           |                                                                                                                                                                            |             |    |
|-----------|----------------------------------------------------------------------------------------------------------------------------------------------------------------------------|-------------|----|
| PFK       | ATP-dependent 6-phosphofructokinase; Catalyzes the phosphorylation of D-fructose 6-phosphate to fructose 1,6-bisphosphate by ATP, the first committing step of glycolysis. | 1,822940304 | UP |
| ClpA/ClpB | Uncharacterized protein; Belongs to the ClpA/ClpB family.                                                                                                                  | 1,865270956 | UP |
| UNK       | Uncharacterized protein.                                                                                                                                                   | 1,870124439 | UP |
| SNZ       | SOR_SNZ domain-containing protein; Belongs to the PdxS/SNZ family.                                                                                                         | 1,933166336 | UP |
| PPM       | PPM-type phosphatase domain-containing protein.                                                                                                                            | 2,141540449 | UP |
| GST1      | Uncharacterized protein; Belongs to the glycosyltransferase 1 family.                                                                                                      | 2,186677595 | UP |
| DOG       | DOG1 domain-containing protein.                                                                                                                                            | 2,203489912 | UP |
| UNK       | Uncharacterized protein.                                                                                                                                                   | 2,204546565 | UP |
| UNK       | Uncharacterized protein.                                                                                                                                                   | 2,240369625 | UP |
| Fe2OGD    | Fe2OG dioxygenase domain-containing protein; Belongs to the iron/ascorbate-dependent oxidoreductase family.                                                                | 2,242449416 | UP |
| UNK       | Uncharacterized protein.                                                                                                                                                   | 2,268827622 | UP |
| UNK       | Uncharacterized protein.                                                                                                                                                   | 2,320439114 | UP |
| INO1      | Inos-1-P_synth domain-containing protein.                                                                                                                                  | 2,323935178 | UP |
| PPM       | PPM-type phosphatase domain-containing protein.                                                                                                                            | 2,325712398 | UP |
| PPM       | PPM-type phosphatase domain-containing protein.                                                                                                                            | 2,353847191 | UP |
| SS        | Str_synth domain-containing protein.                                                                                                                                       | 2,355372448 | UP |
| UNK       | Uncharacterized protein.                                                                                                                                                   | 2,371183195 | UP |
| UNK       | Uncharacterized protein.                                                                                                                                                   | 2,413058424 | UP |
| HSP70     | Uncharacterized protein; Belongs to the heat shock protein 70 family.                                                                                                      | 2,425603806 | UP |
| HSP70     | Uncharacterized protein; Belongs to the heat shock protein 70 family.                                                                                                      | 2,443397534 | UP |
| UNK       | Uncharacterized protein.                                                                                                                                                   | 2,491837289 | UP |
| UNK       | Uncharacterized protein.                                                                                                                                                   | 2,530680881 | UP |
| TRX       | Thioredoxin; Belongs to the thioredoxin family.                                                                                                                            | 2,623623216 | UP |
| PPM       | PPM-type phosphatase domain-containing protein.                                                                                                                            | 2,678447309 | UP |
| UNK       | Uncharacterized protein.                                                                                                                                                   | 2,750318096 | UP |

|         |                                                                                                             |             |    |
|---------|-------------------------------------------------------------------------------------------------------------|-------------|----|
| HSP70   | Uncharacterized protein; Belongs to the heat shock protein 70 family.                                       | 2,780246858 | UP |
| UGT     | HATPase_c domain-containing protein.                                                                        | 2,821325781 | UP |
| WDRR    | WD_REPEATS_REGION domain-containing protein.                                                                | 2,824404157 | UP |
| UNK     | Uncharacterized protein.                                                                                    | 2,958507685 | UP |
| UNK     | Uncharacterized protein.                                                                                    | 3,108005874 | UP |
| EPI     | Epimerase domain-containing protein.                                                                        | 3,198566919 | UP |
| Fe2OGD  | Fe2OG dioxygenase domain-containing protein; Belongs to the iron/ascorbate-dependent oxidoreductase family. | 3,208482257 | UP |
| BETV1   | Bet_v_1 domain-containing protein.                                                                          | 3,242973303 | UP |
| HOMEBOX | Homeobox domain-containing protein.                                                                         | 3,245550459 | UP |
| UNK     | Uncharacterized protein.                                                                                    | 3,265528455 | UP |
| SHSP20  | SHSP domain-containing protein; Belongs to the small heat shock protein (HSP20) family.                     | 3,464485275 | UP |
| UNK     | Uncharacterized protein.                                                                                    | 3,593884339 | UP |
| SHSP20  | SHSP domain-containing protein; Belongs to the small heat shock protein (HSP20) family.                     | 3,599048836 | UP |
| UNK     | Uncharacterized protein.                                                                                    | 3,605452339 | UP |
| SHSP20  | SHSP domain-containing protein; Belongs to the small heat shock protein (HSP20) family.                     | 3,669253356 | UP |
| BETV1   | Bet_v_1 domain-containing protein.                                                                          | 3,750034765 | UP |
| SHSP20  | SHSP domain-containing protein; Belongs to the small heat shock protein (HSP20) family.                     | 3,816534924 | UP |
| SHSP20  | SHSP domain-containing protein; Belongs to the small heat shock protein (HSP20) family.                     | 4,052430939 | UP |
| SHSP20  | SHSP domain-containing protein; Belongs to the small heat shock protein (HSP20) family.                     | 4,13398657  | UP |
| UNK     | Uncharacterized protein.                                                                                    | 4,196228188 | UP |
| UNK     | Uncharacterized protein.                                                                                    | 4,209360194 | UP |
| BAG     | BAG domain-containing protein.                                                                              | 4,223508997 | UP |
| SHSP20  | SHSP domain-containing protein; Belongs to the small heat shock protein (HSP20) family.                     | 4,29370107  | UP |
| UNK     | Uncharacterized protein.                                                                                    | 4,293879257 | UP |
| Fe2OGD  | Fe2OG dioxygenase domain-containing protein; Belongs to the iron/ascorbate-dependent oxidoreductase family. | 4,360586521 | UP |

|        |                                                                                         |             |    |
|--------|-----------------------------------------------------------------------------------------|-------------|----|
| BRO1   | BRO1 domain-containing protein.                                                         | 5,085458292 | UP |
| SHSP20 | SHSP domain-containing protein; Belongs to the small heat shock protein (HSP20) family. | 5,374805897 | UP |
| SHSP20 | SHSP domain-containing protein; Belongs to the small heat shock protein (HSP20) family. | 5,583507584 | UP |
| AAI    | AAI domain-containing protein.                                                          | 5,634763065 | UP |
| UNK    | Uncharacterized protein.                                                                | 5,665829193 | UP |
| SHSP20 | SHSP domain-containing protein; Belongs to the small heat shock protein (HSP20) family. | 6,122736038 | UP |
| HSP70  | Uncharacterized protein; Belongs to the heat shock protein 70 family.                   | 6,338553731 | UP |
| DHN    | Uncharacterized protein; Belongs to the plant dehydrin family.                          | 6,931087944 | UP |
